CORRECTION

# Correction: Do Laboratory Mouse Females that Lose Their Litters Behave Differently around Parturition?

The *PLOS ONE* Staff

The following information is missing from the Funding section: Publication of this paper was funded by FEDER—Fundo Europeu de Desenvolvimento Regional funds through the COMPETE 2020—Operational Programme for Competitiveness and Internationalisation (POCI), Portugal 2020, and by Portuguese funds through FCT—Fundação para a Ciência e a Tecnologia/Ministério da Ciência, Tecnologia e Inovação in the framework of the project "Institute for Research and Innovation in Health Sciences" (POCI-01-0145-FEDER-007274). IASO received this funding. The publisher apologizes for the error.

## Reference

1. Weber EM, Hultgren J, Algers B, Olsson IAS (2016) Do Laboratory Mouse Females that Lose Their Litters Behave Differently around Parturition? PLoS ONE 11(8): e0161238. doi:[10.1371/journal.pone.0161238](https://doi.org/10.1371/journal.pone.0161238) PMID: [27575720](https://pubmed.ncbi.nlm.nih.gov/27575720/)

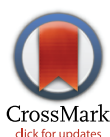

## OPEN ACCESS

**Citation:** The *PLOS ONE* Staff (2016) Correction: Do Laboratory Mouse Females that Lose Their Litters Behave Differently around Parturition? PLoS ONE 11(10): e0165578. doi:[10.1371/journal.pone.0165578](https://doi.org/10.1371/journal.pone.0165578)

**Published:** October 21, 2016

**Copyright:** © 2016 The PLOS ONE Staff. This is an open access article distributed under the terms of the [Creative Commons Attribution License](https://creativecommons.org/licenses/by/4.0/), which permits unrestricted use, distribution, and reproduction in any medium, provided the original author and source are credited.
